# Supplementary material
Source: publisher figshare collection journal article supplement (https://acs.figshare.com/ndownloader/files/32386905)
Supplement: Supplementary file 1 [file 32386905]

# Supporting Information

## Biomimetic Aligned Micro-/Nanofibrous Composite Membranes with Ultrafast Water Transport and Evaporation for Efficient Indoor Humidification

Jingxiu Chen,<sup>†</sup> Jianzhang Mai,<sup>‡</sup> Chao Wang,<sup>†</sup> Yanyan Lin,<sup>†</sup> Dongyang Miao,<sup>†</sup> Yongqiang Lin,<sup>§</sup> Aijaz Ahmed Babar,<sup>†,||</sup> Xianfeng Wang,<sup>\*,†,⊥</sup> Jianyong Yu<sup>\*,†</sup> and Bin Ding<sup>†</sup>

<sup>†</sup>Innovation Center for Textile Science and Technology, College of Textiles, Donghua University, Shanghai 201620, China

<sup>‡</sup>Guangdong Midea Refrigeration Equipment Co., Ltd., Foshan, Guangdong 528311, China

<sup>§</sup>Qing Yuan Polytechnic, Qingyuan, Guangdong 511510, China

<sup>||</sup>Textile Engineering Department, Mehran University of Engineering and Technology, Jamshoro 76060, Pakistan

<sup>⊥</sup>College of Textiles Science and Engineering, Wuhan Textile University, Wuhan 430073, China

\*Email: wxf@dhu.edu.cn.

\*Email: yujy@dhu.edu.cn.

**Supplementary Information contains:**

Supplementary Figures S1-S13

Supplementary Tables S1-S3

Supplementary Movies S1-S7

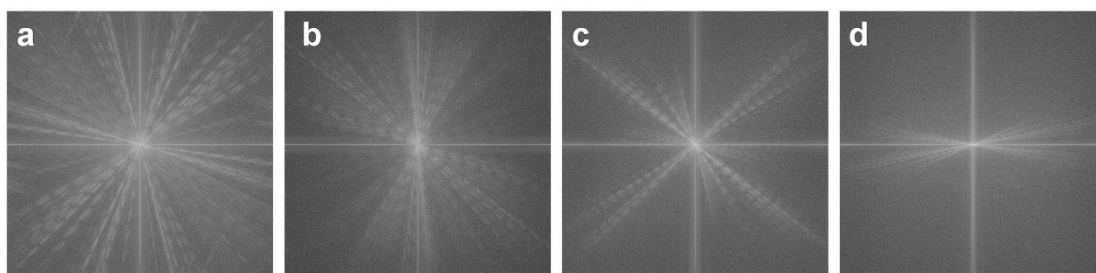

**Figure S1.** 2D-FFT for PAN NFMs at various RH of (a) 25%, (b) 45%, (c) 65%, and (d) 85%.

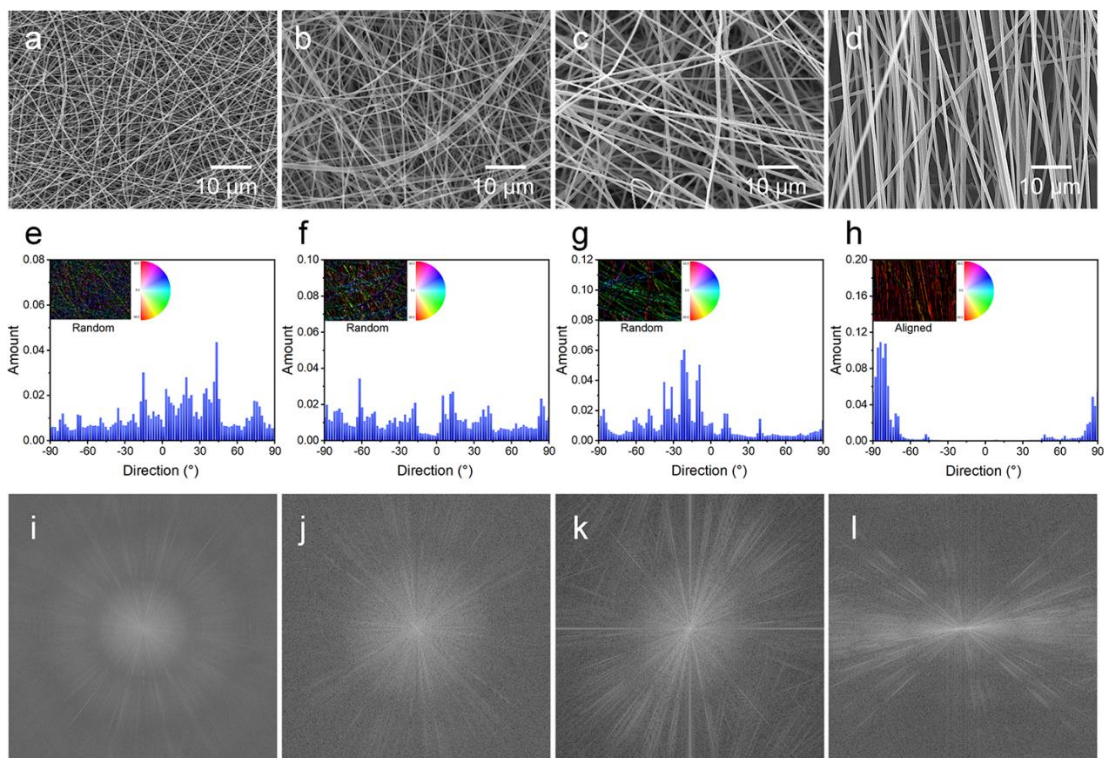

**Figure S2.** SEM images of PAN NFMs at various RH of (a) 25%, (b) 45%, (c) 65%, and (d) 85%. (e–h) Directionality histograms for PAN NFMs in (a–d). Color images of nanofibers indicate the angle mapping of fiber orientations. (i–l) 2D-FFT for PAN NFMs in (a–d).

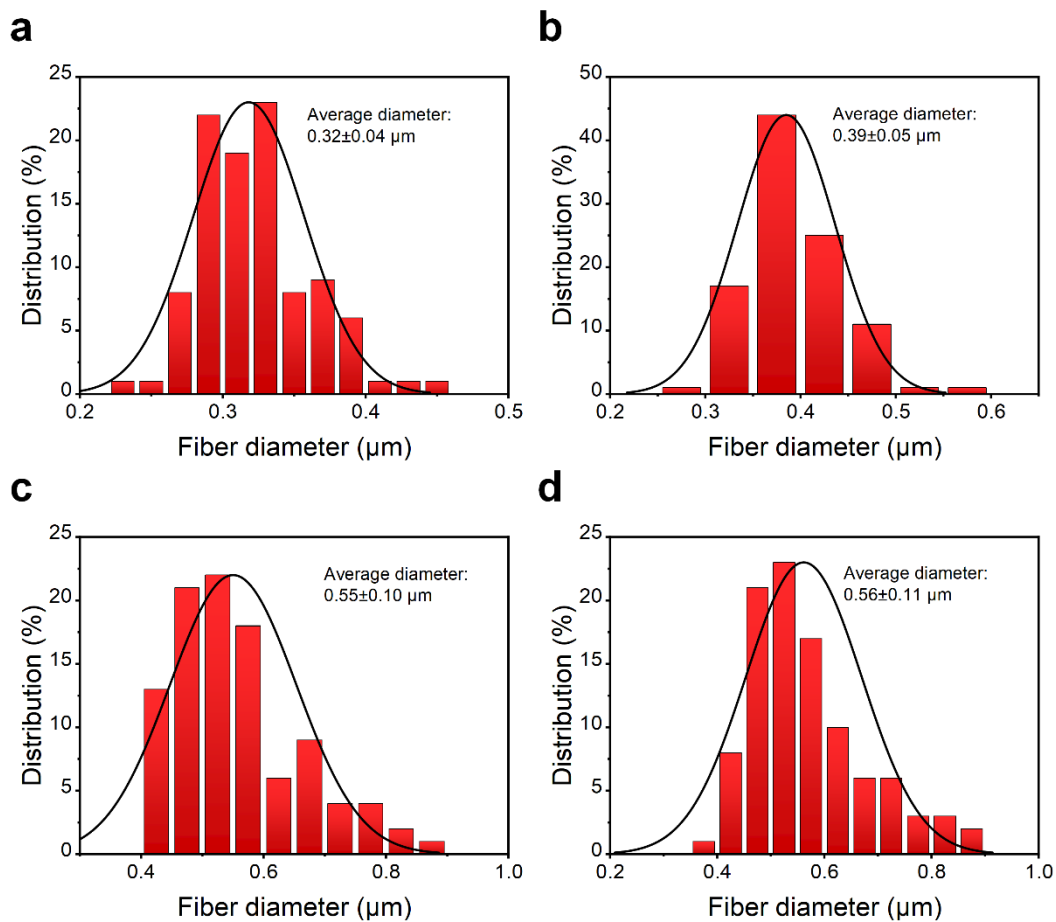

**Figure S3.** Fiber diameter distribution of PAN NFMs at different RH of (a) 25%, (b) 45%, (c) 65%, and (d) 85%.

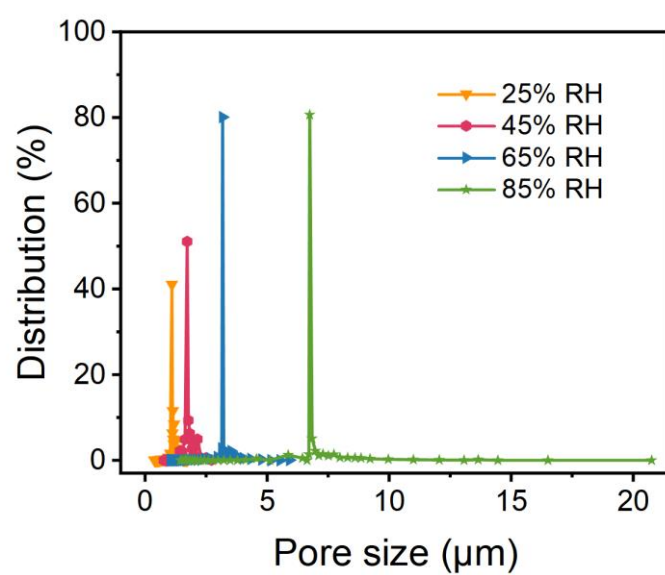

**Figure S4.** Pore size distribution of PAN NFMs at different RH of (a) 25%, (b) 45%, (c) 65%, and (d) 85%.

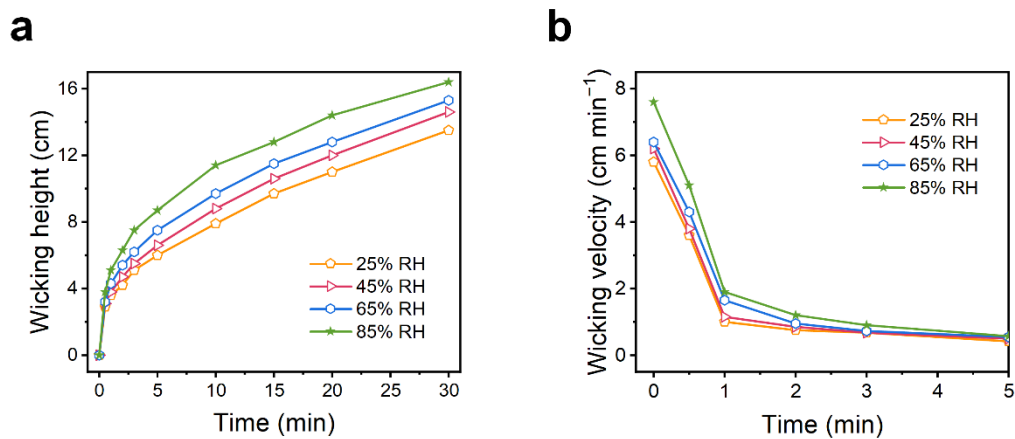

**Figure S5.** Wetting behavior of the micro-/nanofibrous composite membranes at different RH: (a) wicking height and (b) wicking velocity.

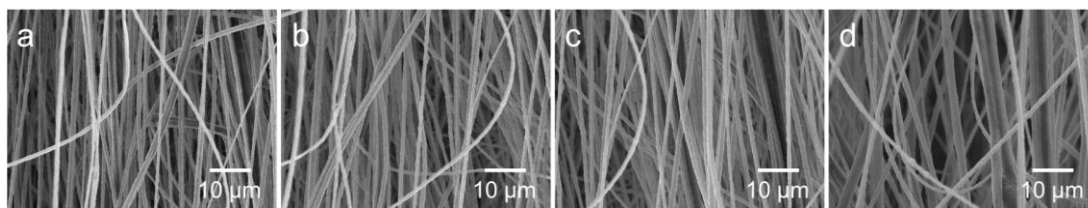

**Figure S6.** SEM images of PAN-SiO<sub>2</sub> NFMs with various concentrations of SiO<sub>2</sub> NPs:

(a) 5 wt %, (b) 10 wt %, (c) 20 wt %, and (d) 30 wt %.



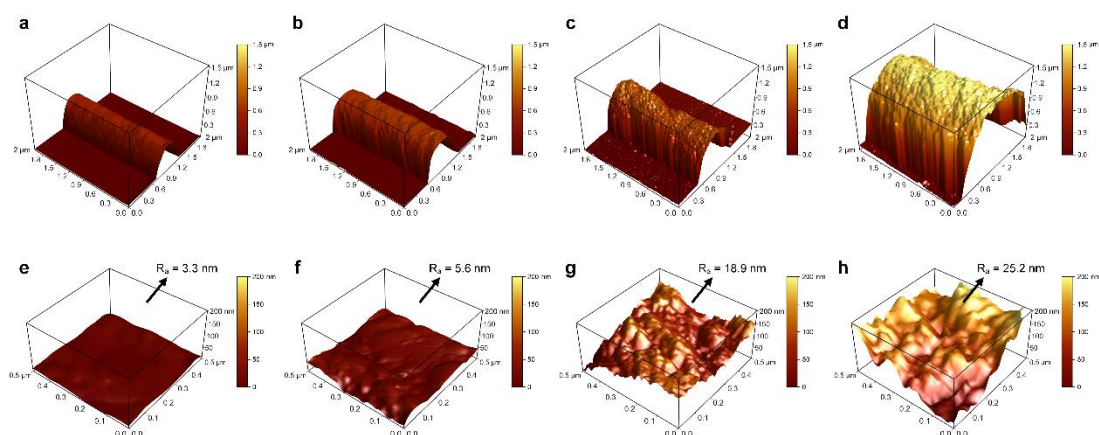

**Figure S7.** (a-d) 3D AFM images of the original PAN-SiO<sub>2</sub> nanofibers with various concentrations of SiO<sub>2</sub> NPs: (a) 0 wt %, (b) 5 wt %, (c) 10 wt %, and (d) 30 wt %. The images were further plane fitted to calculate the average roughness of the corresponding (e) PAN-SiO<sub>2</sub>-0, (f) PAN-SiO<sub>2</sub>-5, (g) PAN-SiO<sub>2</sub>-10, and (h) PAN-SiO<sub>2</sub>-30 fiber.

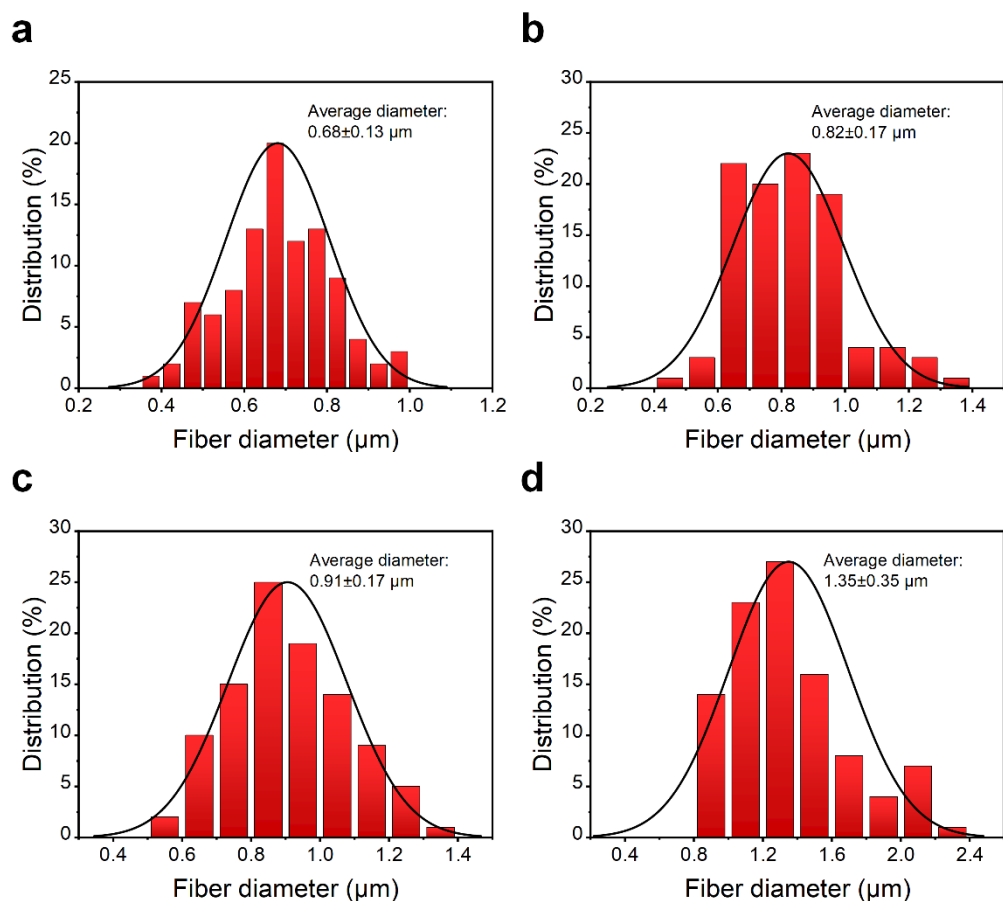

**Figure S8.** Fiber diameter distribution of PAN-SiO<sub>2</sub> NFMs with various concentrations of SiO<sub>2</sub> NPs: (a) 5 wt %, (b) 10 wt %, (c) 20 wt %, and (d) 30 wt %.

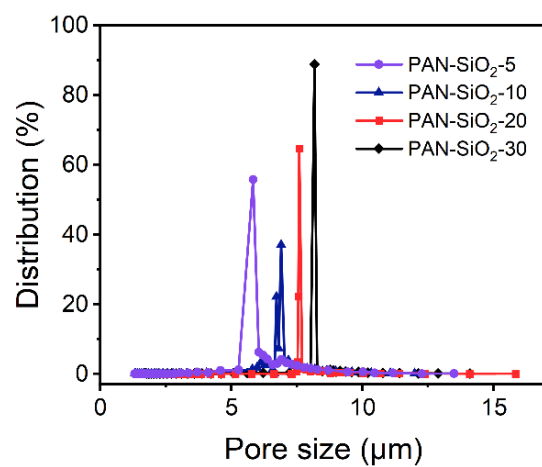

**Figure S9.** Pore size distribution of PAN-SiO<sub>2</sub> NFMs with various concentrations of SiO<sub>2</sub> NPs: (a) 5 wt %, (b) 10 wt %, (c) 20 wt %, and (d) 30 wt %.

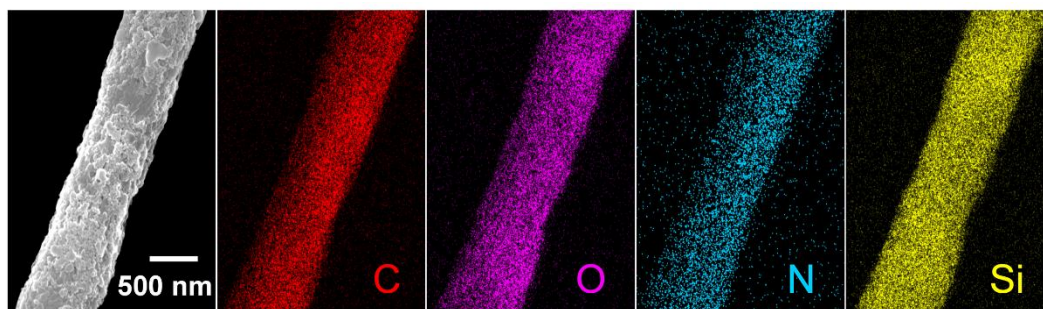

**Figure S10.** FE-SEM image and corresponding elemental maps of PAN-SiO<sub>2</sub>-20 nanofiber.

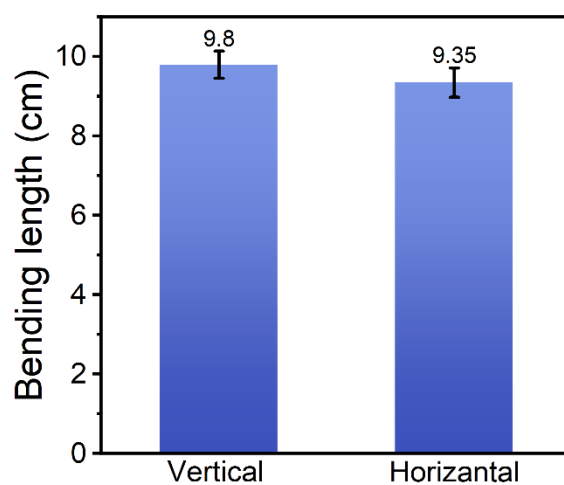

**Figure S11.** The mechanical stiffness of PAN nanofiber/NW composite membrane. The vertical and horizontal bending lengths were 9.8 cm and 9.35 cm, respectively.

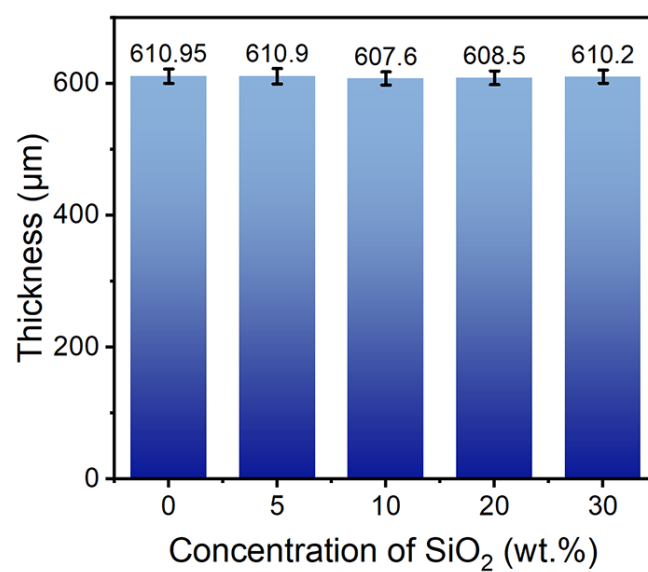

**Figure S12.** The thickness of highly aligned PAN-SiO<sub>2</sub> nanofiber/NW composite membranes with different concentrations of SiO<sub>2</sub> NPs.

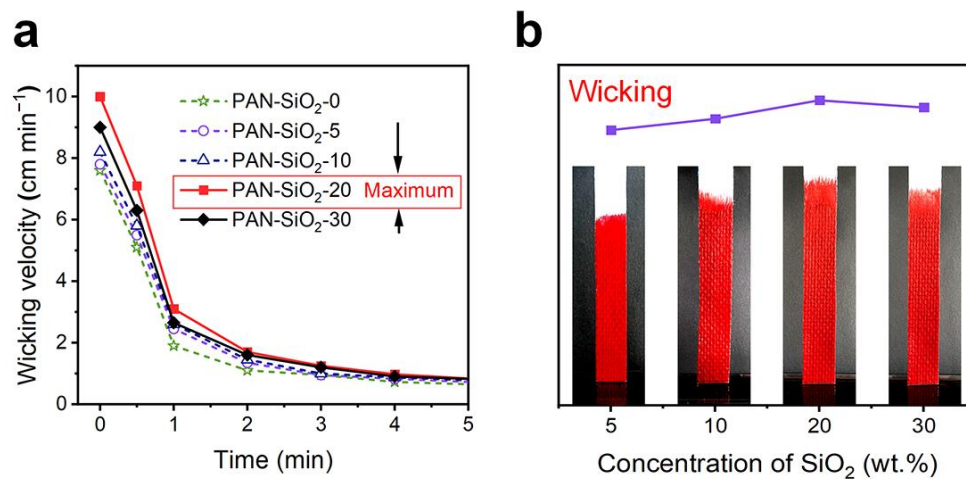

**Figure S13.** Wetting behavior of the PAN nanofiber/NW composite membranes with different concentrations of SiO<sub>2</sub> NPs: (a) wicking height and (b) Optical photographs.

**Table S1.** Humidification performance of the nonwoven fabric and micro-/nanofibrous composite membranes.

| <b>Sample</b>       | <b>Wicking<br/>velocity<br/>(cm 30min<sup>-1</sup>)</b> | <b>Water<br/>absorption<br/>(%)</b> | <b>Pressure<br/>drop<br/>(Pa)</b> | <b>Water<br/>evaporation<br/>rate<br/>(mL h<sup>-1</sup>)</b> | <b>Humidity<br/>capacity<br/>(mL h<sup>-1</sup>)</b> |
|---------------------|---------------------------------------------------------|-------------------------------------|-----------------------------------|---------------------------------------------------------------|------------------------------------------------------|
| Nonwoven            | 9.3                                                     | 346                                 | 0                                 | 0.28                                                          | 327                                                  |
| Composite membranes | 19.5                                                    | 497.7                               | 14.4                              | 0.34                                                          | 514                                                  |



**Table S2.** Properties of PAN-SiO<sub>2</sub> precursor solutions with various SiO<sub>2</sub> NPs concentrations.

| <b>PAN<br/>(wt %)</b> | <b>SiO<sub>2</sub> NPs<br/>concentration<br/>(wt %)</b> | <b>Viscosity<br/>(cps)</b> | <b>Surface<br/>Tension<br/>(mN m<sup>-1</sup>)</b> | <b>Conductivity<br/>(uS cm<sup>-1</sup>)</b> |
|-----------------------|---------------------------------------------------------|----------------------------|----------------------------------------------------|----------------------------------------------|
| 10                    | 0                                                       | 1060.97                    | 35.47                                              | 298                                          |
| 10                    | 5                                                       | 1253.03                    | 35.42                                              | 290                                          |
| 10                    | 10                                                      | 2606.80                    | 34.76                                              | 284                                          |
| 10                    | 20                                                      | 3226.46                    | 34.12                                              | 278                                          |
| 10                    | 30                                                      | 4256.43                    | 33.24                                              | 275                                          |

**Table S3.** XPS data of PAN-SiO<sub>2</sub> NFMs with different concentrations of SiO<sub>2</sub> NPs.

| <b>SiO<sub>2</sub> NPs<br/>concentration<br/>(wt %)</b> | <b>Atomic content (%)</b> |          |          |           |
|---------------------------------------------------------|---------------------------|----------|----------|-----------|
|                                                         | <b>C</b>                  | <b>N</b> | <b>O</b> | <b>Si</b> |
| 0                                                       | 75.75                     | 19.78    | 4.47     | 0         |
| 5                                                       | 74.80                     | 20.63    | 4.07     | 0.50      |
| 10                                                      | 73.28                     | 20.21    | 5.33     | 1.18      |
| 20                                                      | 69.48                     | 19.75    | 8.10     | 2.67      |
| 30                                                      | 63.22                     | 17.78    | 13.46    | 5.54      |

**Movie S1.**

Water transport process from the top view of the random PAN NFM, the 200  $\mu\text{L}$  red ink droplet was dropped on the surface of membrane.

**Movie S2.**

Water transport process from the top view of the highly aligned PAN NFM, the 200  $\mu\text{L}$  red ink droplet was dropped on the surface of membrane.

**Movie S3.**

Wetting behavior of the highly aligned PAN-SiO<sub>2</sub>-0 nanofiber/NW composite membrane, the 5  $\mu\text{L}$  water was dropped on the surface of membrane.

**Movie S4.**

Wetting behavior of the highly aligned PAN-SiO<sub>2</sub>-5 nanofiber/NW composite membrane, the 5  $\mu\text{L}$  water was dropped on the surface of membrane.

**Movie S5.**

Wetting behavior of the highly aligned PAN-SiO<sub>2</sub>-10 nanofiber/NW composite membrane, the 5  $\mu\text{L}$  water was dropped on the surface of membrane.

**Movie S6.**

Wetting behavior of the highly aligned PAN-SiO<sub>2</sub>-20 nanofiber/NW composite membrane, the 5  $\mu\text{L}$  water was dropped on the surface of membrane.

**Movie S7.**

Wetting behavior of the highly aligned PAN-SiO<sub>2</sub>-30 nanofiber/NW composite membrane, the 5  $\mu\text{L}$  water was dropped on the surface of membrane.
